# Supplementary material for: Diversity and Antimicrobial Resistance Genotypes in Non-Typhoidal Salmonella Isolates from Poultry Farms in Uganda
Source: MDPI journal article supplement (doi:10.3390/ijerph15020324), 2018-02-13
Supplement: s1 [file s1]

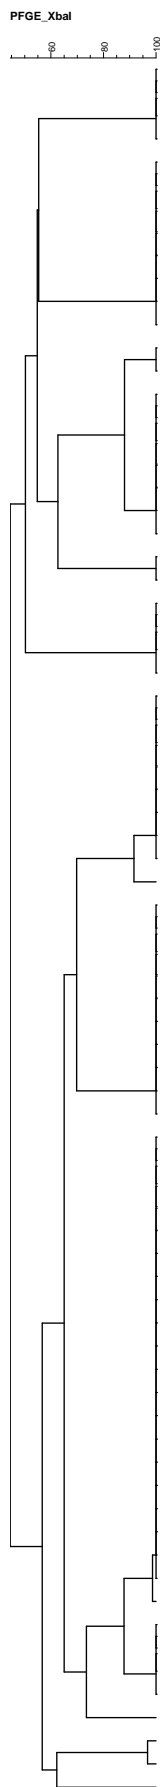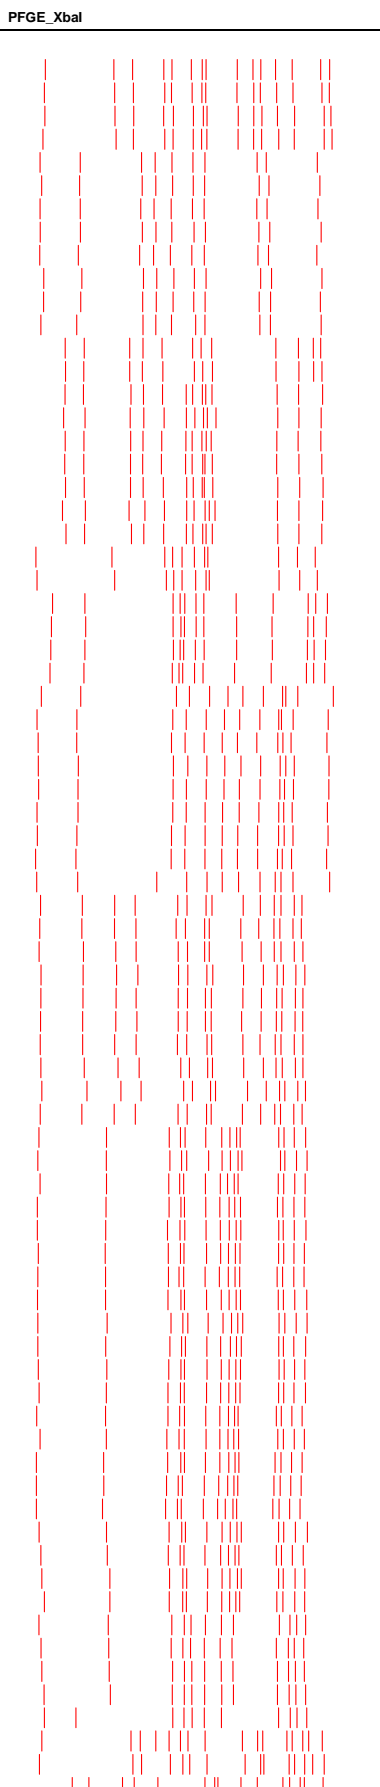

| Farm | Isolate   | Serotype               | District | Farm size | Pulsotype |
|------|-----------|------------------------|----------|-----------|-----------|
|      | W035 N45  | Salmonella Mbandaka    | 1        | 3         | N         |
|      | W042 N46  | Salmonella Mbandaka    | 1        | 3         | N         |
|      | M047 N48  | Salmonella Mbandaka    | 3        | 1         | N         |
|      | M047 N56  | Salmonella Mbandaka    | 3        | 1         | N         |
|      | L002 N19  | Salmonella Bolton      | 2        | 2         | D         |
|      | L002 N20  | Salmonella Bolton      | 2        | 2         | D         |
|      | L002 N21  | Salmonella Bolton      | 2        | 2         | D         |
|      | W006 N22  | Salmonella Bolton      | 2        | 1         | D         |
|      | W018 N54  | Salmonella Bolton      | 1        | 3         | D         |
|      | W018 N59  | Salmonella Bolton      | 1        | 3         | D         |
|      | W010 N61  | Salmonella Bolton      | 1        | 1         | D         |
|      | L083 N65  | Salmonella Bolton      | 2        | 1         | D         |
|      | M063 N64  | Salmonella Heidelberg  | 3        | 2         | A         |
|      | M010 N88  | Salmonella Heidelberg  | 3        | 2         | A         |
|      | L004 N35  | Salmonella Heidelberg  | 2        | 2         | B         |
|      | L004 N36  | Salmonella Heidelberg  | 2        | 2         | B         |
|      | L050 N37  | Salmonella Heidelberg  | 2        | 1         | B         |
|      | L011 N38  | Salmonella Heidelberg  | 2        | 1         | B         |
|      | L043 N39  | Salmonella Heidelberg  | 2        | 1         | B         |
|      | W035 N42  | Salmonella Heidelberg  | 1        | 3         | B         |
|      | W035 N43  | Salmonella Heidelberg  | 1        | 3         | B         |
|      | L084 N75  | Salmonella Kampala     | 2        | 1         | C         |
|      | M037 N92  | Salmonella Kampala     | 3        | 1         | C         |
|      | L025 N67  | Salmonella Enteritidis | 2        | 1         | I         |
|      | W010 N71  | Salmonella Enteritidis | 1        | 1         | I         |
|      | L056 N80  | Salmonella Enteritidis | 2        | 2         | I         |
|      | L025 N87  | Salmonella Enteritidis | 2        | 1         | I         |
|      | W003 N166 | Salmonella Zanzibar    | 1        | 1         | E         |
|      | W025 N181 | Salmonella Zanzibar    | 1        | 3         | E         |
|      | M050 N182 | Salmonella Zanzibar    | 3        | 3         | E         |
|      | W003 N187 | Salmonella Zanzibar    | 1        | 1         | E         |
|      | W026 N193 | Salmonella Zanzibar    | 1        | 3         | E         |
|      | W026 N194 | Salmonella Zanzibar    | 1        | 3         | E         |
|      | M050 N195 | Salmonella Zanzibar    | 3        | 3         | E         |
|      | W025 N196 | Salmonella Zanzibar    | 1        | 3         | E         |
|      | M037 N108 | Salmonella Uganda      | 3        | 1         | M         |
|      | W025 N104 | Salmonella Aberdeen    | 1        | 3         | F         |
|      | W026 N105 | Salmonella Aberdeen    | 1        | 3         | F         |
|      | M063 N66  | Salmonella Aberdeen    | 3        | 2         | F         |
|      | M067 N68  | Salmonella Aberdeen    | 3        | 2         | F         |
|      | M054 N76  | Salmonella Aberdeen    | 3        | 2         | F         |
|      | M050 N78  | Salmonella Aberdeen    | 3        | 3         | F         |
|      | M051 N83  | Salmonella Aberdeen    | 3        | 2         | F         |
|      | M052 N94  | Salmonella Aberdeen    | 3        | 2         | F         |
|      | M052 N96  | Salmonella Aberdeen    | 3        | 2         | F         |
|      | L057 N97  | Salmonella Aberdeen    | 2        | 1         | F         |
|      | W059 N01  | Salmonella Newport     | 1        | 3         | H         |
|      | W059 N02  | Salmonella Newport     | 1        | 3         | H         |
|      | W059 N03  | Salmonella Newport     | 1        | 3         | H         |
|      | L042 N04  | Salmonella Newport     | 2        | 1         | H         |
|      | L042 N05  | Salmonella Newport     | 2        | 1         | H         |
|      | L042 N06  | Salmonella Newport     | 2        | 1         | H         |
|      | W015 N09  | Salmonella Newport     | 1        | 3         | H         |
|      | M042 N10  | Salmonella Newport     | 3        | 3         | H         |
|      | M042 N11  | Salmonella Newport     | 3        | 3         | H         |
|      | M053 N12  | Salmonella Newport     | 3        | 2         | H         |
|      | M070 N16  | Salmonella Newport     | 3        | 3         | H         |
|      | M070 N17  | Salmonella Newport     | 3        | 3         | H         |
|      | M070 N18  | Salmonella Newport     | 3        | 3         | H         |
|      | M056 N26  | Salmonella Newport     | 3        | 2         | H         |
|      | M015 N27  | Salmonella Newport     | 3        | 1         | H         |
|      | M015 N28  | Salmonella Newport     | 3        | 1         | H         |
|      | M056 N29  | Salmonella Newport     | 3        | 2         | H         |
|      | M055 N30  | Salmonella Newport     | 3        | 1         | H         |
|      | W042 N47  | Salmonella Newport     | 1        | 3         | H         |
|      | W006 N57  | Salmonella Newport     | 1        | 1         | H         |
|      | W018 N53  | Salmonella Newport     | 1        | 3         | H         |
|      | W015 N08  | Salmonella Hadar       | 1        | 3         | G         |
|      | W017 N24  | Salmonella Hadar       | 1        | 3         | G         |
|      | W017 N25  | Salmonella Hadar       | 1        | 3         | G         |
|      | W015 N40  | Salmonella Hadar       | 1        | 3         | G         |
|      | L027 N69  | Salmonella Hadar       | 2        | 1         | O         |
|      | L067 N114 | Salmonella Hadar       | 2        | 1         | J         |
|      | L067 N136 | Salmonella Hadar       | 2        | 1         | K         |
|      | L021 N31  | Salmonella Typhimurium | 2        | 1         | L         |
