# Supplementary material for: Diversity and Antimicrobial Resistance Genotypes in Non-Typhoidal Salmonella Isolates from Poultry Farms in Uganda
Source: MDPI journal article supplement (doi:10.3390/ijerph15020324), 2018-02-13
Supplement: s1 [file s1]

**Table S1: Non-typhoidal *Salmonella* isolates from Uganda 2017 showing phenotypic and genotypic antimicrobial resistance profiles for selected antimicrobials**

| Sample_id | Farm_id | Farm Size | District | Serotype    | Phen.Res            | Res.genes          | Integrans                   |
|-----------|---------|-----------|----------|-------------|---------------------|--------------------|-----------------------------|
| N01       | W059    | 3         | Wakiso   | S. Newport  | CIP,SUL             |                    |                             |
| N02       | W059    | 3         | Wakiso   | S. Newport  |                     |                    |                             |
| N03       | W059    | 3         | Wakiso   | S. Newport  |                     |                    |                             |
| N04       | L042    | 1         | Lira     | S. Newport  |                     |                    |                             |
| N05       | L042    | 1         | Lira     | S. Newport  | CIP,SUL             |                    |                             |
| N06       | L042    | 1         | Lira     | S. Newport  | CIP                 |                    |                             |
| N08       | W015    | 3         | Wakiso   | S. Hadar    | SUL,TRIM,SXT        | <i>sul1,dhfr1,</i> | <i>class1(dfrA15,aadA1)</i> |
| N09       | W015    | 3         | Wakiso   | S. Newport  | CIP,SUL             |                    |                             |
| N10       | M042    | 3         | Masaka   | S. Newport  | CIP,SUL             |                    |                             |
| N104      | W025    | 3         | Wakiso   | S. Aberdeen |                     |                    |                             |
| N105      | W026    | 3         | Wakiso   | S. Aberdeen |                     |                    |                             |
| N108      | M037    | 1         | Lira     | S. Uganda   |                     |                    |                             |
| N11       | M042    | 3         | Masaka   | S. Newport  | CIP,SUL             |                    |                             |
| N114      | L067    | 1         | Lira     | S. Hadar    |                     |                    |                             |
| N12       | M053    | 2         | Masaka   | S. Newport  | CIP                 |                    |                             |
| N128      | L067    | 1         | Lira     | S. Hadar    |                     |                    |                             |
| N13       | W019    | 3         | Wakiso   | S. Newport  | CIP,SUL,TET,ENR,SXT | <i>qnrS,tetA</i>   |                             |
| N136      | L067    | 1         | Lira     | S. Hadar    |                     |                    |                             |
| N14       | W019    | 3         | Wakiso   | S. Newport  | CIP,TET,ENR         | <i>qnrS,tetA</i>   |                             |
| N15       | W019    | 3         | Wakiso   | S. Newport  | CIP,TET,ENR         | <i>qnrS,tetA</i>   |                             |
| N16       | M070    | 3         | Masaka   | S. Newport  | TET                 |                    |                             |
| N166      | W003    | 1         | Wakiso   | S.Zanzibar  | TET                 | <i>tetA</i>        |                             |
| N17       | M070    | 3         | Masaka   | S. Newport  | CIP,SUL             | <i>qnrS</i>        |                             |
| N18       | M070    | 3         | Masaka   | S. Newport  | CIP,SUL             | <i>qnrS</i>        |                             |
| N181      | W025    | 3         | Wakiso   | S.Zanzibar  | TET                 | <i>tetA</i>        |                             |

|      |      |   |        |                   |              |                           |                             |
|------|------|---|--------|-------------------|--------------|---------------------------|-----------------------------|
| N182 | M050 | 3 | Masaka | S.Zanzibar        | TET          | <i>tetA</i>               |                             |
| N187 | W003 | 1 | Wakiso | S.Zanzibar        | CIP,TET      | <i>tetA</i>               |                             |
| N19  | L002 | 2 | Lira   | S. Bolton         | CIP,SUL,TET  | <i>sul1,tetA</i>          |                             |
| N193 | W026 | 3 | Wakiso | S.Zanzibar        | TET          | <i>tetA</i>               |                             |
| N194 | W026 | 3 | Wakiso | S.Zanzibar        | TET          | <i>tetA</i>               |                             |
| N195 | M050 | 3 | Masaka | S.Zanzibar        | TET          | <i>tetA</i>               |                             |
| N196 | W025 | 3 | Wakiso | S.Zanzibar        | TET          | <i>tetA</i>               |                             |
| N20  | L002 | 2 | Lira   | S. Bolton         | CIP          | <i>qnrS</i>               |                             |
| N21  | L002 | 2 | Lira   | S. Bolton         | CIP          | <i>qnrS</i>               |                             |
| N22  | W006 | 1 | Lira   | S. Bolton         | TRIM         |                           |                             |
| N23  | W017 | 3 | Wakiso | S. Hadar          | SUL,TRIM,SXT | <i>sul1,dhfr1</i>         | <i>class1(dfrA15,aadA1)</i> |
| N24  | W017 | 3 | Wakiso | S. Hadar          | SUL,TRIM,SXT | <i>sul1,dhfr1,dhfrVII</i> | <i>class1(dfrA15,aadA1)</i> |
| N25  | W017 | 3 | Wakiso | S. Hadar          | SUL          | <i>sul1</i>               |                             |
| N26  | M056 | 2 | Masaka | S. Newport        |              |                           |                             |
| N27  | M015 | 1 | Masaka | S. Newport        | CIP          | <i>qnrS</i>               |                             |
| N28  | M015 | 1 | Masaka | S. Newport        |              |                           |                             |
| N29  | M056 | 2 | Masaka | S. Newport        | CIP          | <i>qnrS</i>               |                             |
| N30  | M055 | 1 | Masaka | S. Newport        | CIP,SUL      |                           |                             |
| N31  | L021 | 1 | Lira   | S.<br>Typhimurium | CIP,SUL      | <i>sul1</i>               |                             |
| N32  | L021 | 1 | Lira   | S.<br>Typhimurium | SUL          |                           |                             |
| N35  | L004 | 2 | Lira   | S. Heidelberg     | CIP,SUL      |                           |                             |
| N36  | L004 | 2 | Lira   | S. Heidelberg     | CIP,SUL      |                           |                             |
| N37  | L050 | 1 | Lira   | S. Heidelberg     | CIP          |                           |                             |
| N38  | L011 | 1 | Lira   | S. Heidelberg     | CIP          |                           |                             |
| N39  | L043 | 1 | Lira   | S. Heidelberg     | CIP          |                           |                             |
| N40  | W015 | 3 | Wakiso | S. Hadar          | SUL,TRIM,SXT | <i>sul1,dhfr1,dhfrVII</i> | <i>class1(dfrA15,aadA1)</i> |
| N41  | W015 | 3 | Wakiso | S. Hadar          | SUL,TRIM,SXT | <i>sul1,dhfrVII</i>       | <i>class1(dfrA15,aadA1)</i> |

|     |      |   |        |                |             |                         |  |
|-----|------|---|--------|----------------|-------------|-------------------------|--|
| N42 | W035 | 3 | Wakiso | S. Heidelberg  | CIP         |                         |  |
| N43 | W035 | 3 | Wakiso | S. Heidelberg  | CIP         |                         |  |
| N44 | W035 | 3 | Wakiso | S. Heidelberg  | CIP,ENR     |                         |  |
| N45 | W035 | 3 | Wakiso | S. Mbandaka    | CIP,CLR,AMP | <i>qnrS,blaTEM-1</i>    |  |
| N46 | W042 | 3 | Wakiso | S. Mbandaka    | CIP,CLR,AMP | <i>qnrS,blaTEM-1</i>    |  |
| N47 | W042 | 3 | Wakiso | S. Newport     |             |                         |  |
| N48 | M047 | 1 | Masaka | S. Mbandaka    | CIP,CLR,AMP | <i>qnrS,blaTEM-1</i>    |  |
| N53 | W018 | 3 | Wakiso | S. Newport     | CIP,SUL     | <i>qnrS</i>             |  |
| N54 | W018 | 3 | Wakiso | S. Bolton      | CIP         | <i>qnrS</i>             |  |
| N55 | W018 | 3 | Wakiso | S. Bolton      | CIP         | <i>qnrS</i>             |  |
| N56 | M047 | 1 | Masaka | S. Mbandaka    | CIP,CLR,AMP | <i>qnrS,cmlA,blaTEM</i> |  |
| N57 | W006 | 1 | Wakiso | S. Newport     | CIP         |                         |  |
| N59 | W018 | 3 | Wakiso | S. Bolton      | CIP         |                         |  |
| N61 | W010 | 1 | Wakiso | S. Bolton      | CIP         |                         |  |
| N64 | M063 | 2 | Masaka | S. Heidelberg  |             |                         |  |
| N65 | L083 | 1 | Lira   | S. Bolton      |             |                         |  |
| N66 | M063 | 2 | Masaka | S. Aberdeen    |             |                         |  |
| N67 | L025 | 1 | Lira   | S. Enteritidis |             |                         |  |
| N68 | M067 | 2 | Masaka | S. Aberdeen    |             |                         |  |
| N69 | L027 | 1 | Lira   | S. Hadar       |             |                         |  |
| N71 | W010 | 1 | Wakiso | S. Enteritidis |             |                         |  |
| N75 | L084 | 1 | Lira   | S. Kampala     |             |                         |  |
| N76 | M054 | 2 | Masaka | S. Aberdeen    |             |                         |  |
| N78 | M050 | 3 | Masaka | S. Aberdeen    |             |                         |  |
| N80 | L056 | 2 | Wakiso | S. Enteritidis |             |                         |  |
| N83 | M051 | 2 | Masaka | S. Aberdeen    |             |                         |  |
| N87 | L025 | 1 | Lira   | S. Enteritidis |             |                         |  |
| N88 | M010 | 2 | Masaka | S. Heidelberg  |             |                         |  |

|     |      |   |        |             |  |  |  |
|-----|------|---|--------|-------------|--|--|--|
| N91 | L027 | 1 | Lira   | S. Hadar    |  |  |  |
| N92 | M037 | 1 | Masaka | S. Kampala  |  |  |  |
| N94 | M052 | 2 | Masaka | S. Aberdeen |  |  |  |
| N96 | M052 | 2 | Masaka | S. Aberdeen |  |  |  |
| N97 | L057 | 1 | Lira   | S. Aberdeen |  |  |  |

(CIP, ciprofloxacin; SUL, sulphonamide; TET, tetracycline; TRIM, trimethoprim; SXT, sulphamethoxazole/trimethoprim; CLR; chloramphenicol; AMP, ampicillin; ENR; Enrofloxacin) and identified genotypic resistance genes (qnrS, sul1, tetA, dhfrI, dhfrVII, cmlA, blaTEM-1, integrons, dfrA15, aadA1) have been included.
