# Supplementary figures and images for: Diversity and Antimicrobial Resistance Genotypes in Non-Typhoidal Salmonella Isolates from Poultry Farms in Uganda
Source: MDPI journal article supplement (doi:10.3390/ijerph15020324), 2018-02-13

Figure S1: A map showing study areas of Wakiso, Lira, and Masaka in Uganda

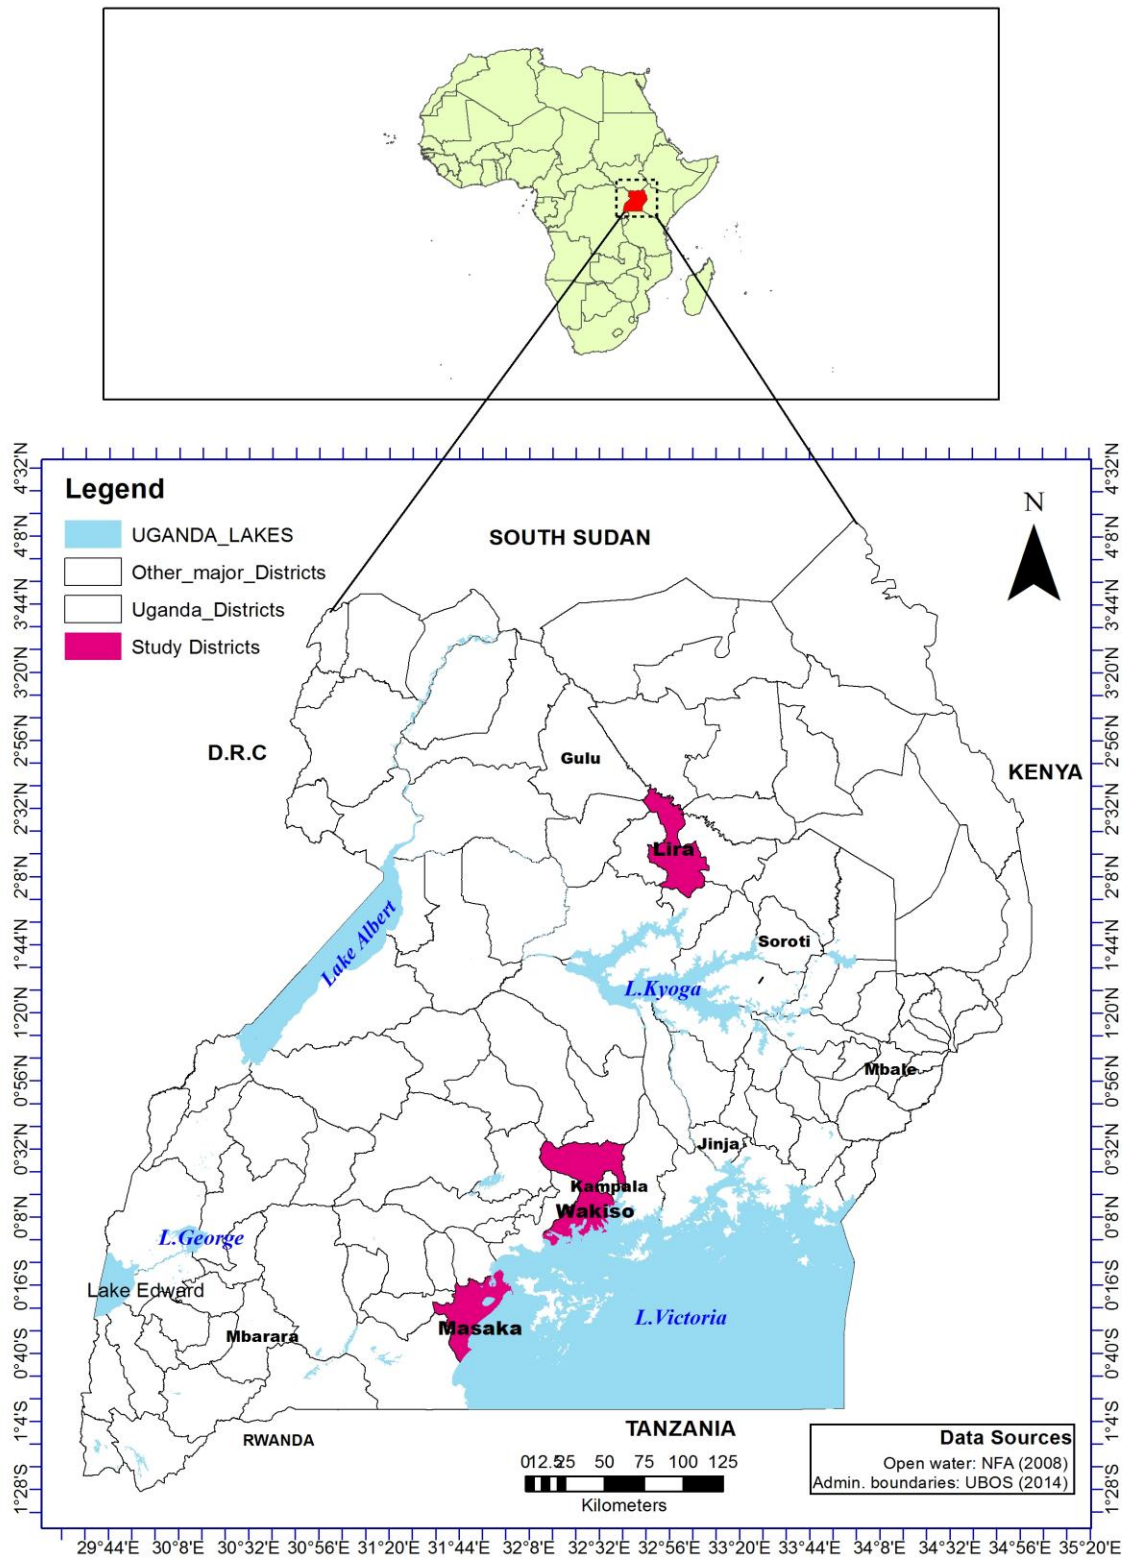

Supplement: s1 [file s1]
